# Supplementary material
Source: HighWire-hosted journal article supplement (https://gut.bmj.com/content/70/9/1734)

Figure S1

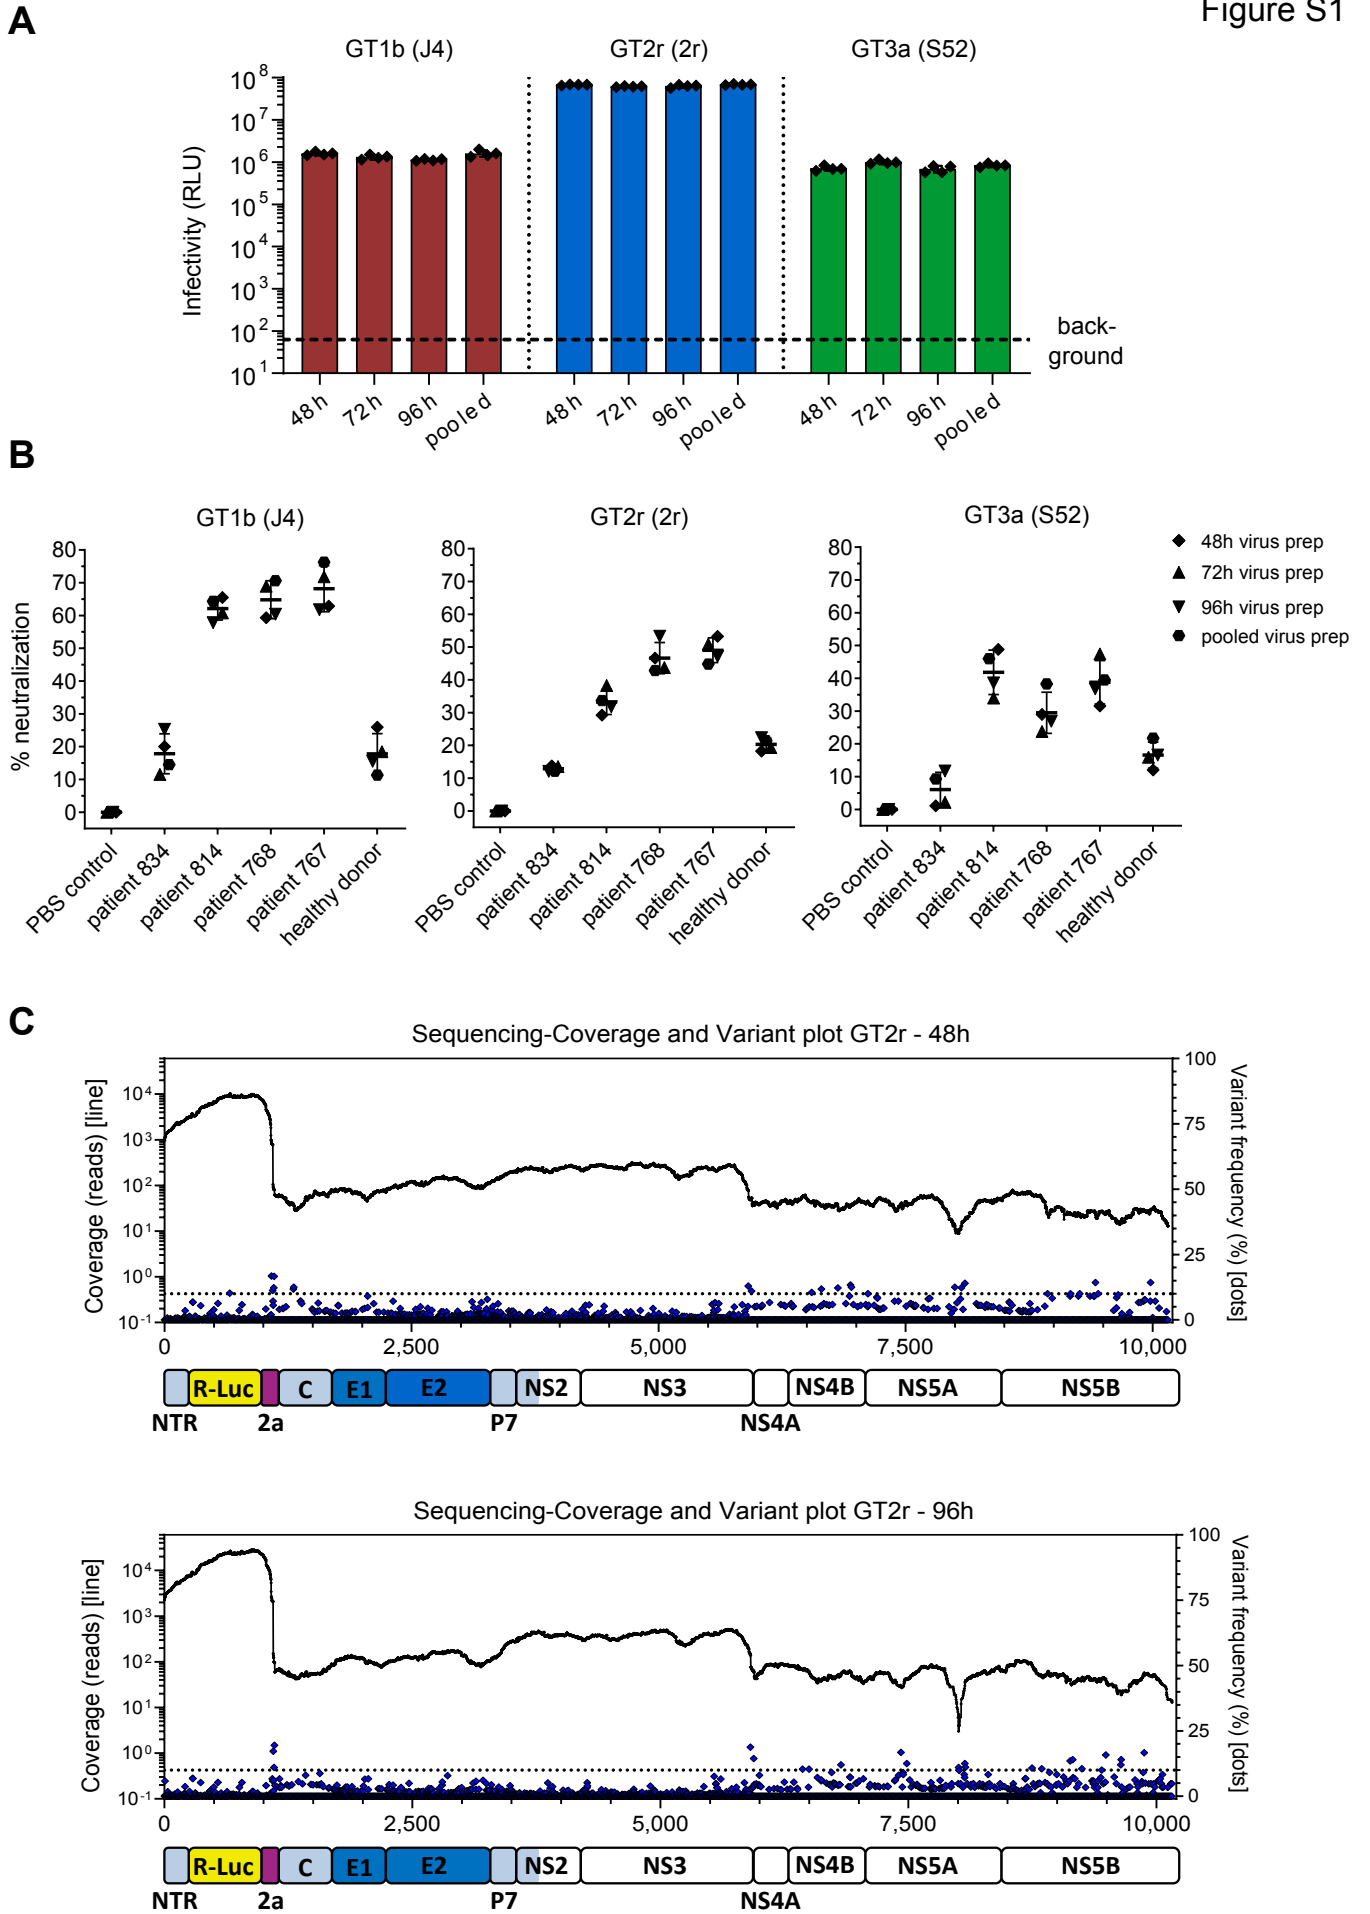

Supplement: inline-supplementary-material-2 [file inline-supplementary-material-2.pdf]

Figure S2

A

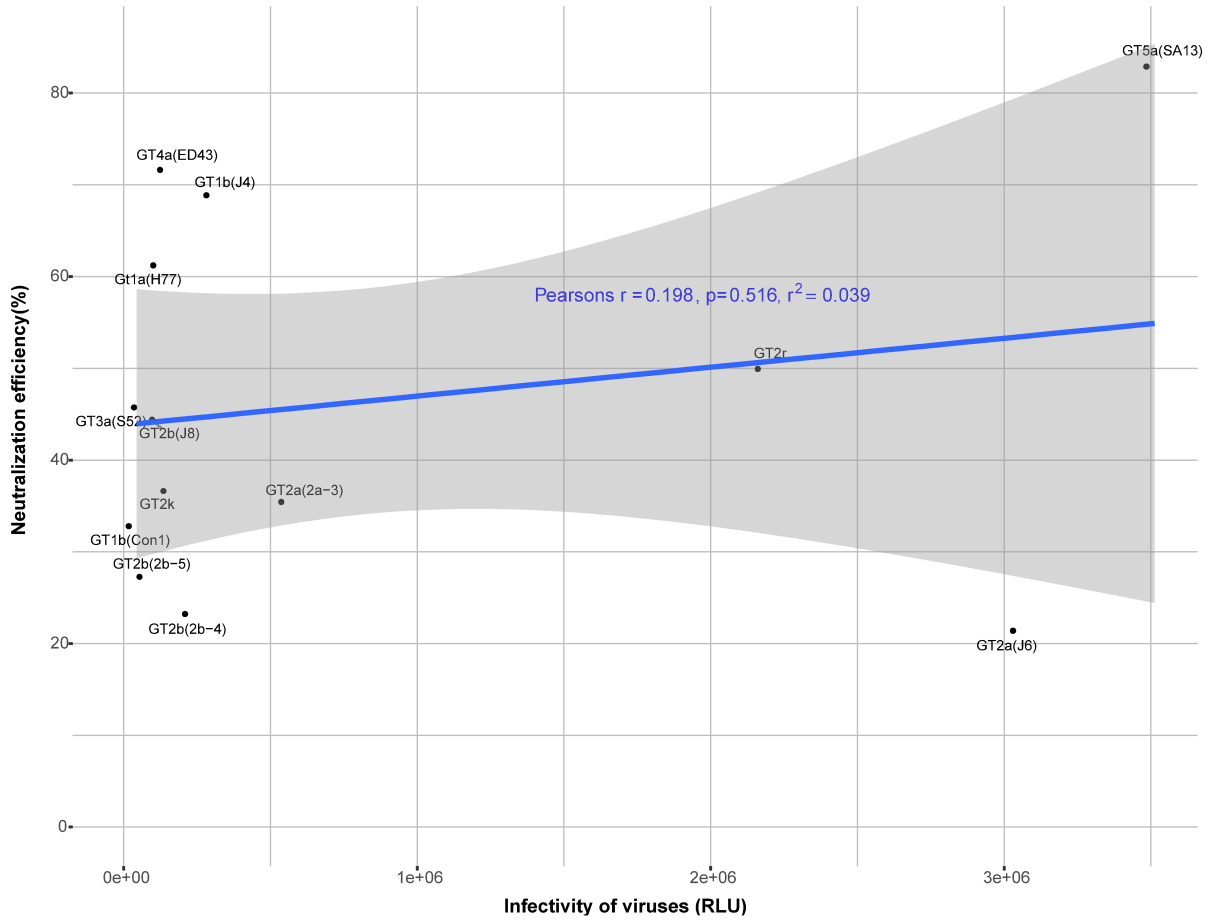

B

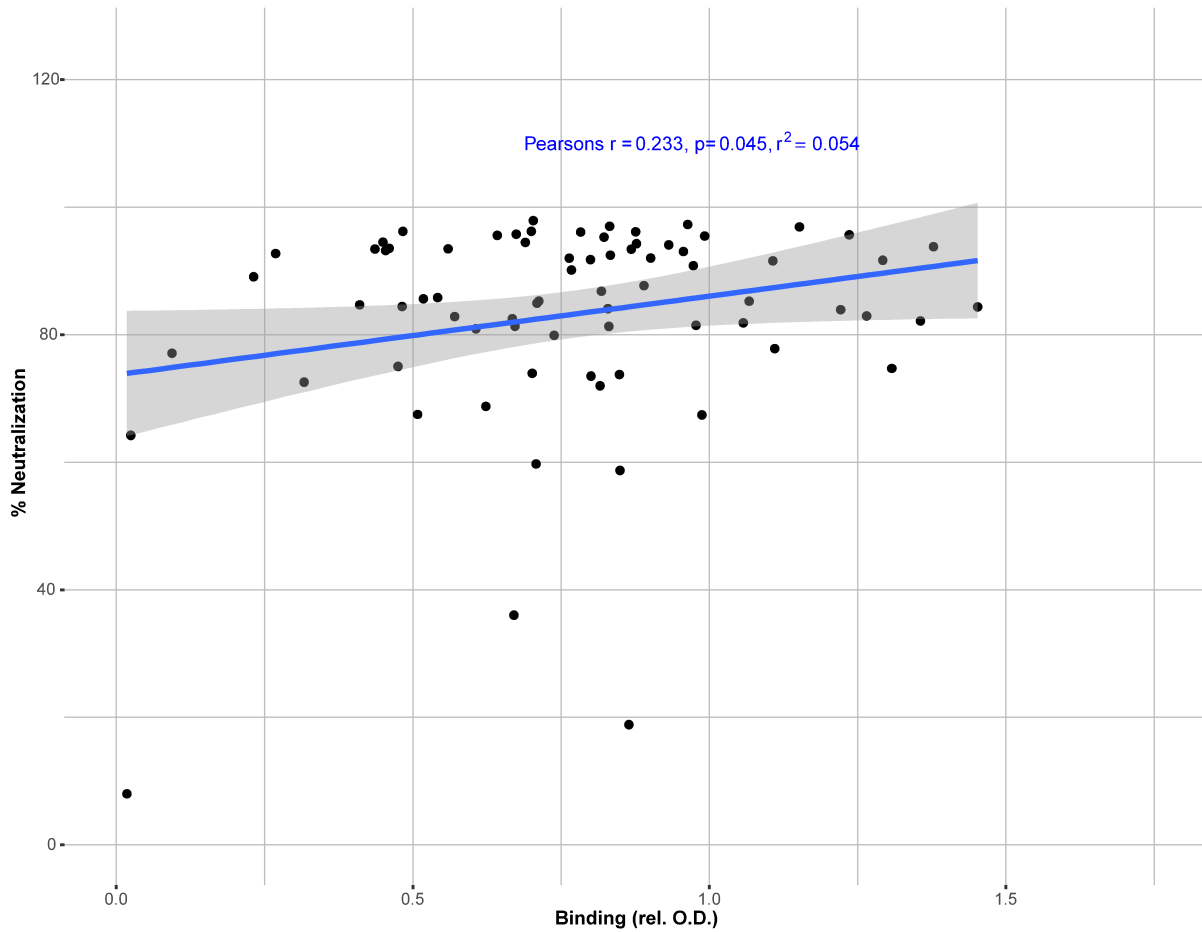

Supplement: inline-supplementary-material-4 [file inline-supplementary-material-4.pdf]

**A** Correlation (average neutralization) Figure S3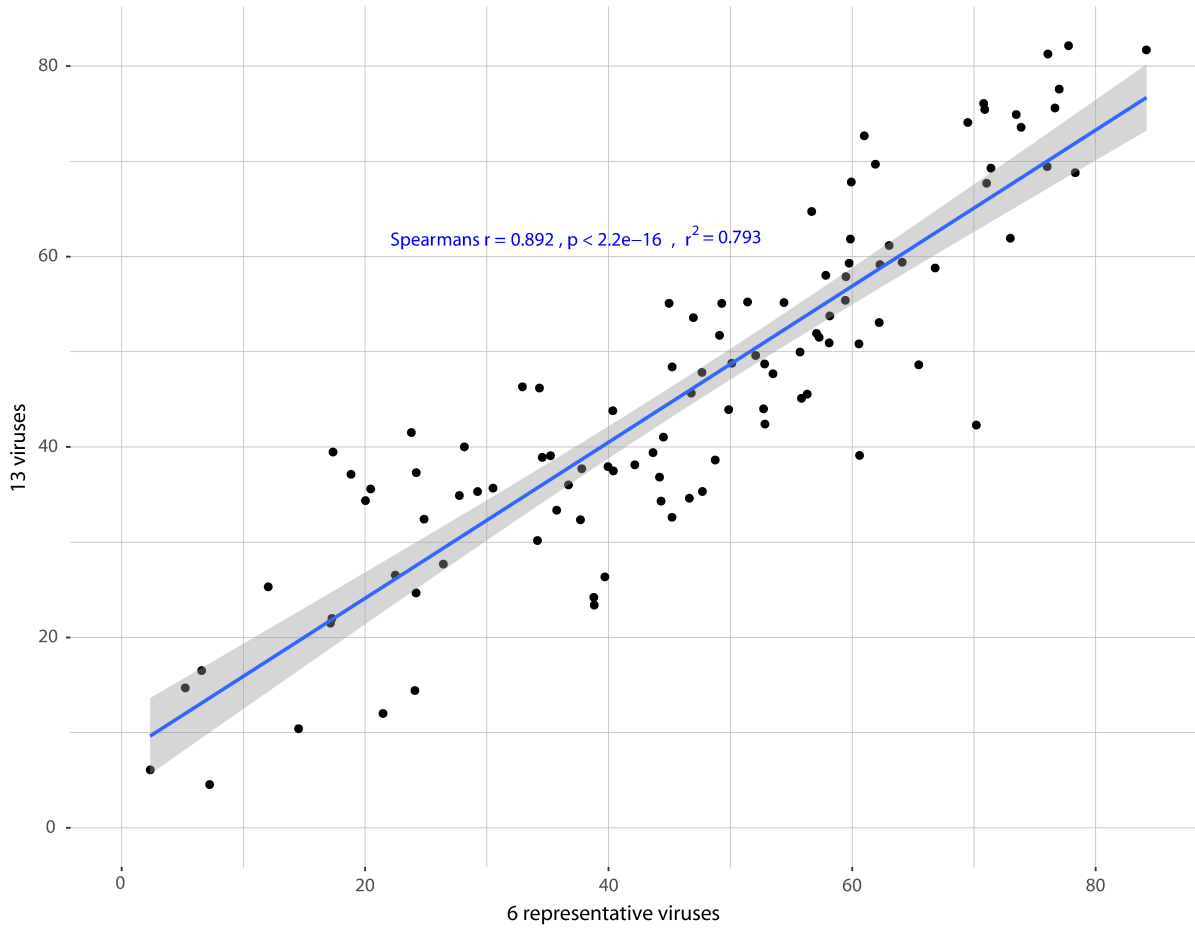**B** Correlation (CNI)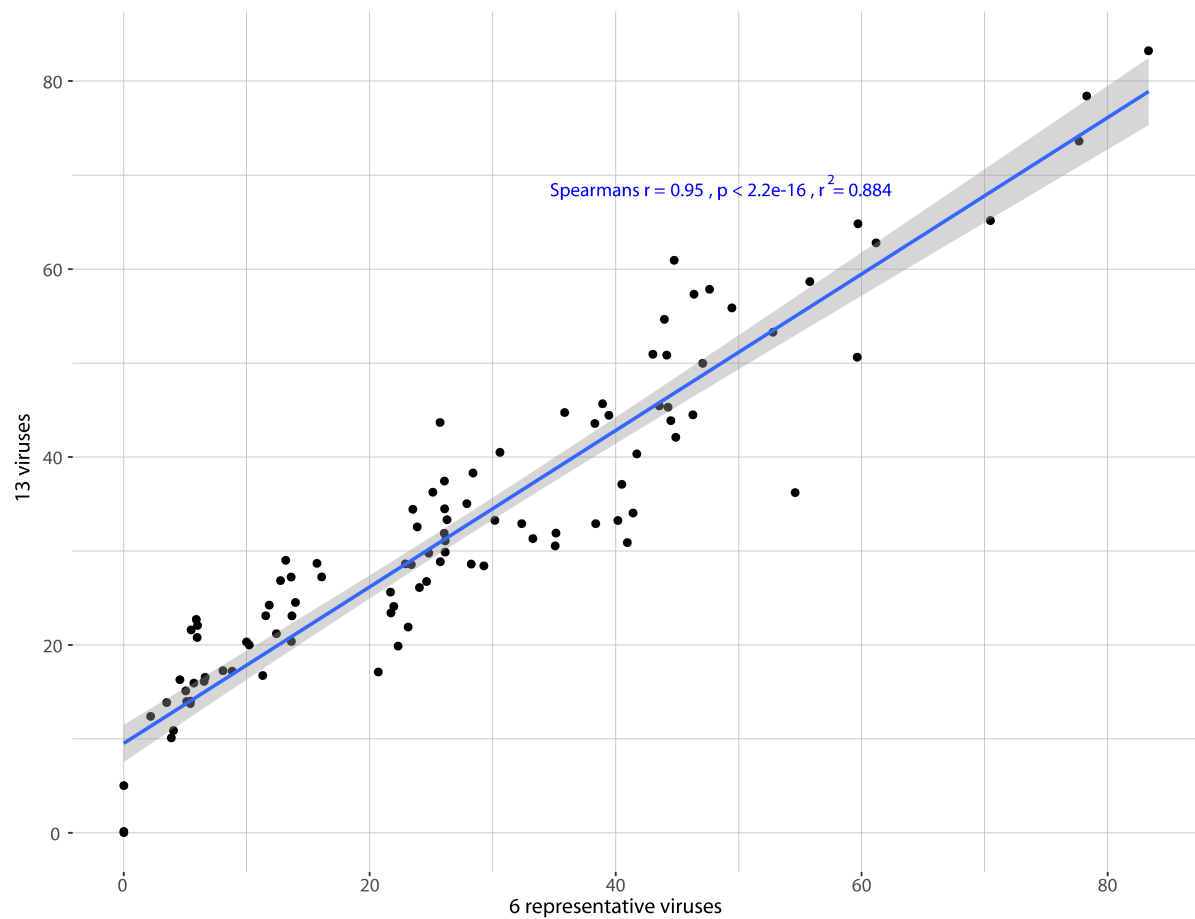

Supplement: inline-supplementary-material-5 [file inline-supplementary-material-5.pdf]

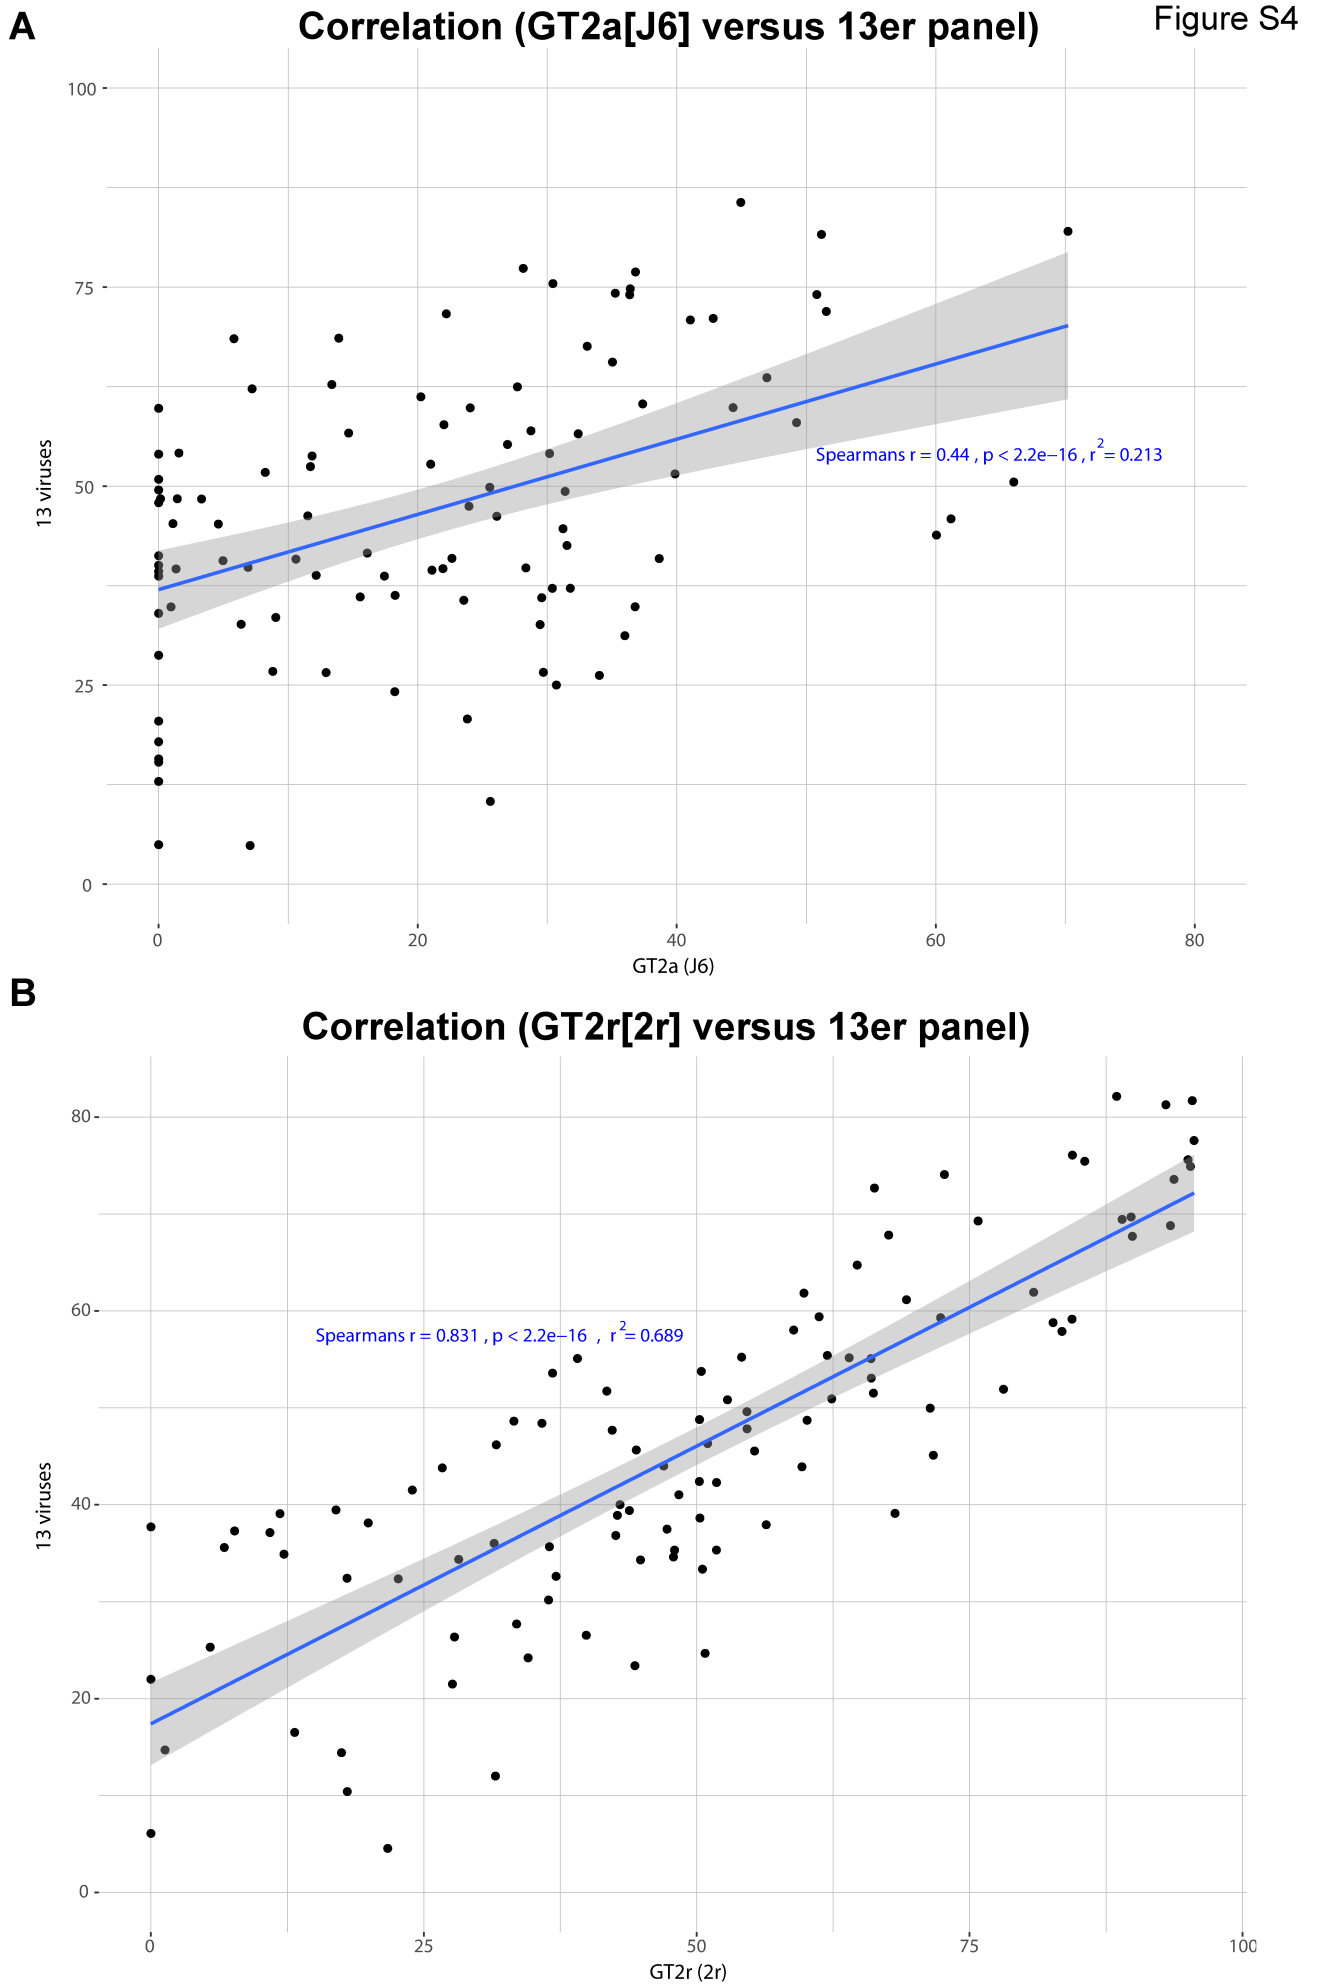

Supplement: inline-supplementary-material-6 [file inline-supplementary-material-6.pdf]

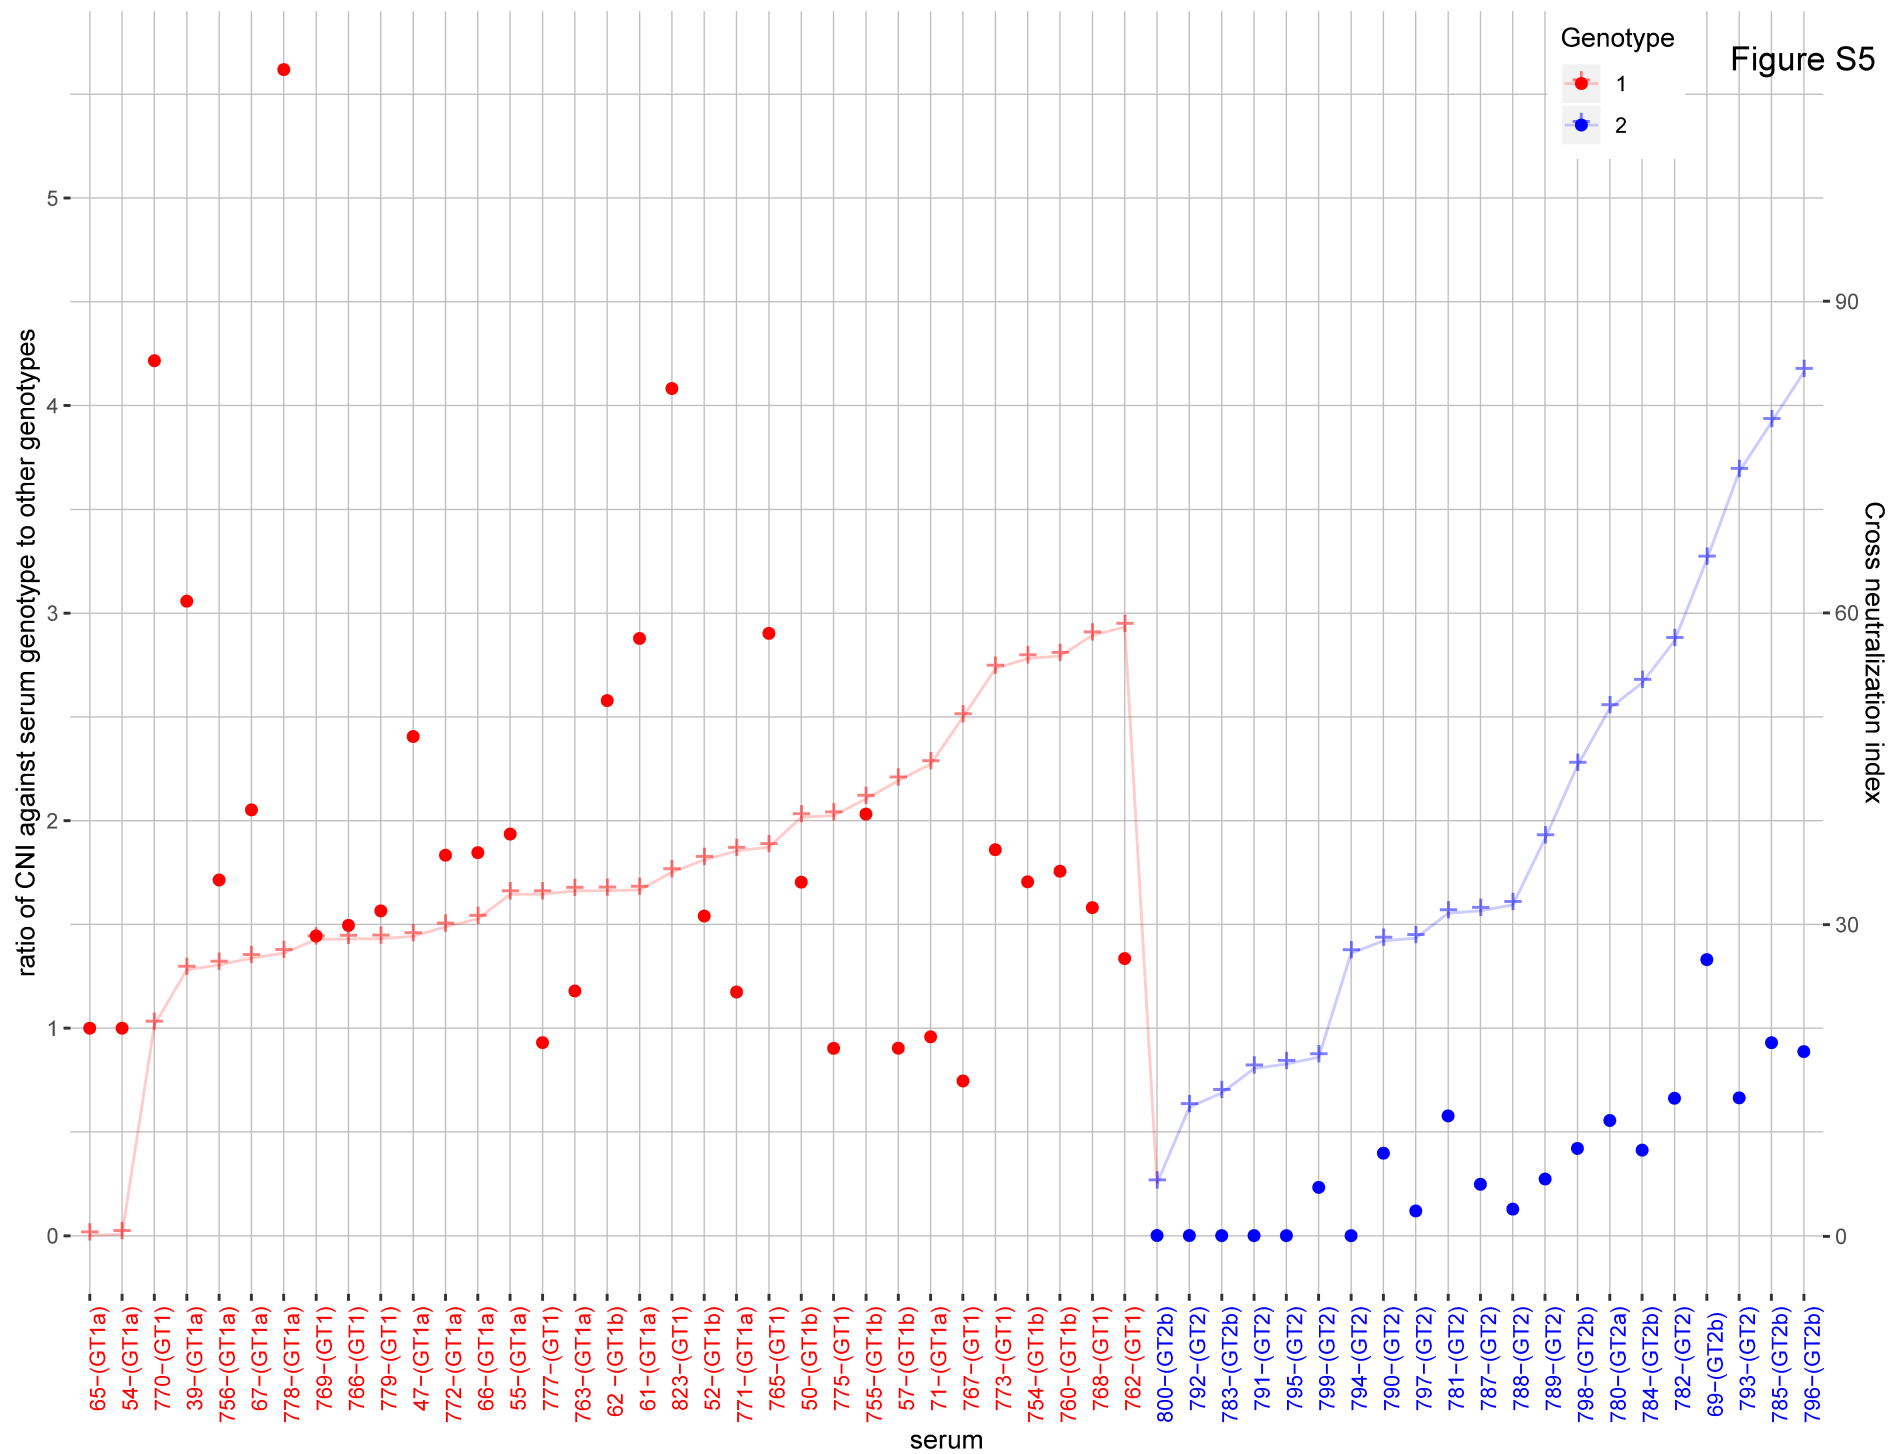

Supplement: inline-supplementary-material-7 [file inline-supplementary-material-7.pdf]

Figure S6

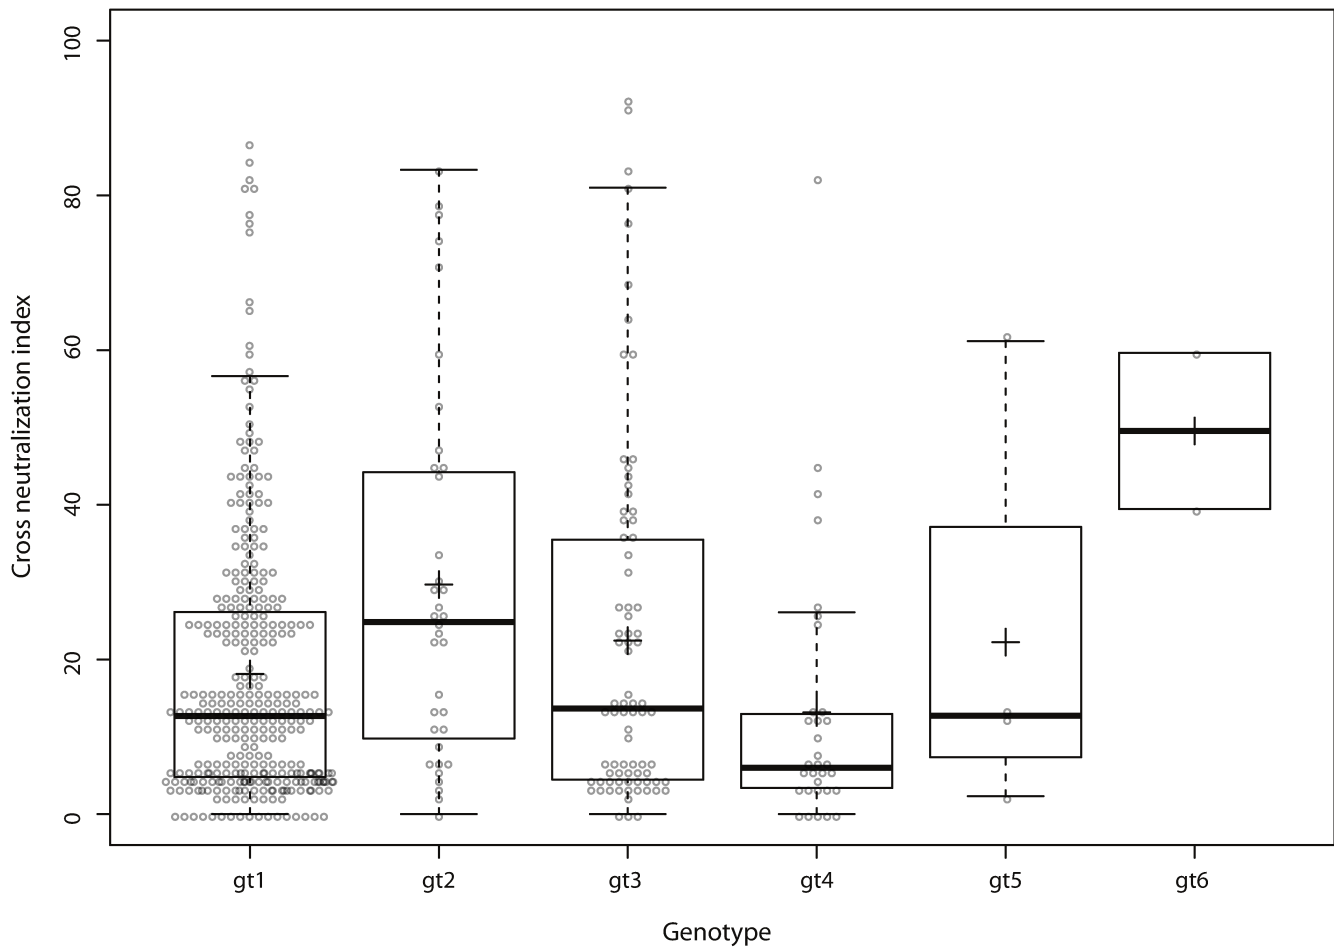

Supplement: inline-supplementary-material-8 [file inline-supplementary-material-8.pdf]

Figure S7

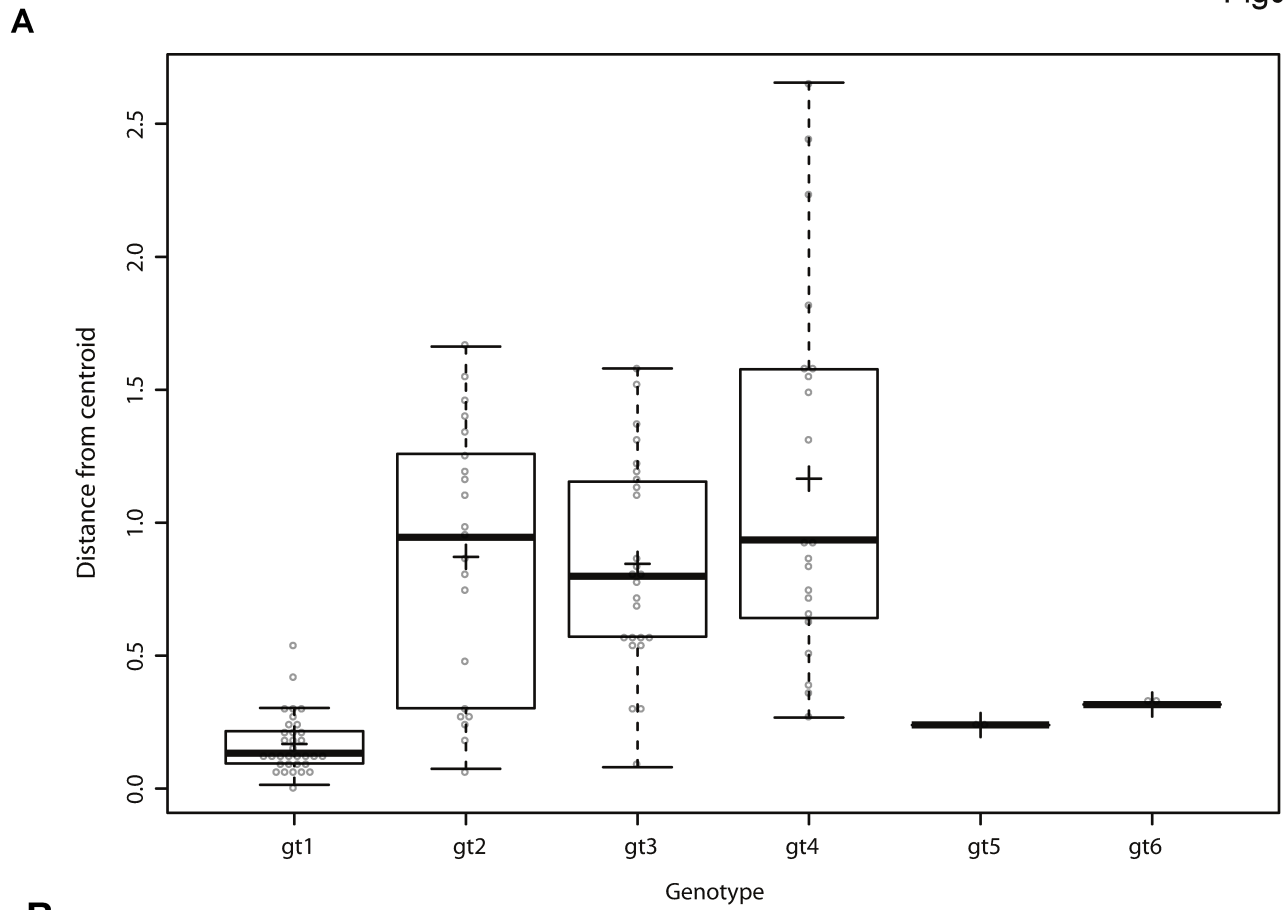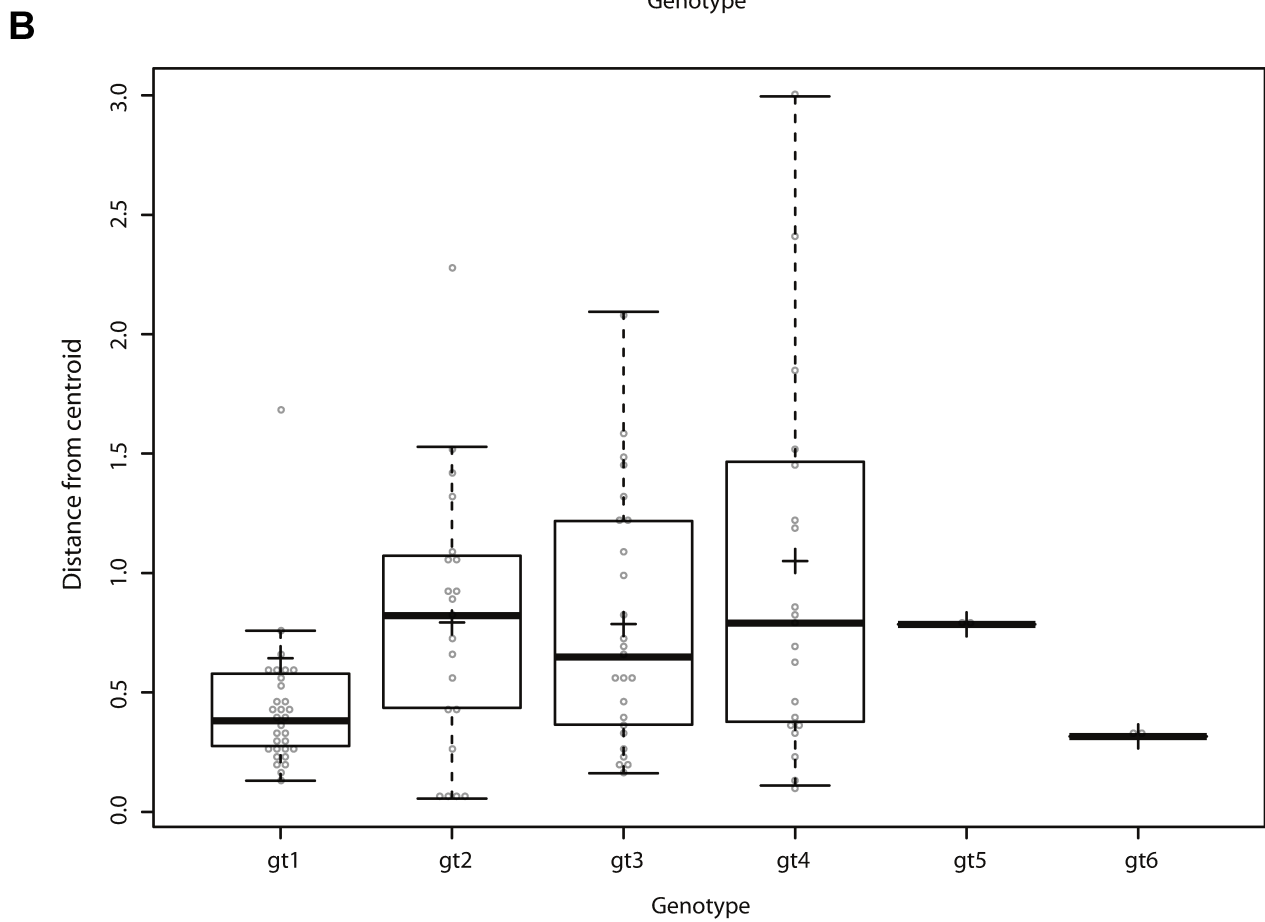

Supplement: inline-supplementary-material-9 [file inline-supplementary-material-9.pdf]
